# Supplementary material for: Future buildings as carbon sinks: Comparative analysis of timber-based building typologies regarding their carbon emissions and storage
Source: Frontiers journal article supplement (doi:10.3389/fbuil.2024.1330105), 2024-03-18
Supplement: Table_1.XLSX [file Table_1.XLSX]

## Sheet: Cover Page
Supplementary Material
List of Contents:	Table S1:		This table contains all building materials and their properties. This inclues the description of their category (majority organic (>75%), minority organic (<25%) and non-organic (0%)), minimum, maximum and mean values of their respective CO2 emission coefficient as well as the materials’ biomass fraction and carbon. Sources that were used to research these specific values are given in form of lit…
	Table S2:		This table contains the exact structure of the builiding assemblies. The used mass of each material [weight in t] and the respective proportion [%] to the building part and total building is shown in the columns. Values in percent were rounded to two decimal places. Source data was provided by Tegel Projekt GmbH.
	Table S3: Output Table		The third table contains the output in tabular form from the numerical algorithm. The material and the building part are shown, with the respective weight [t], carbon emissions [t] and carbon storage [t]. The materials were grouped for the pie charts. The classification can be seen in the last column.

## Sheet: Table S1
category	material	min. CO2 coefficient [kg CO2 eq. per kg of material]	mean CO2 coefficient [kg CO2 eq. per kg of material]	max. CO2 coefficient [kg CO2 eq. per kg of material]	biomass fraction	carbon ratio	source
non-organic	absorbent capillary fleece	5.6	5.6	5.6	0	0	Baubook GmbH. Vlies PES. (accessed 28 June 2023).
minority organic	best screed element	0.0262	0.0262	0.0262	0.175	0.43	Institut Bauen und Umwelt e.V. 2022. UMWELT-PRODUKTDEKLARATION nach ISO 14025 und EN 15804+A2. fermacell® GipsfaserPlatten James Hardie Europe GmbH. EPD-JAM-20220071-CBD1-DE. (accessed 28 June 2023).
non-organic	brick unfilled	0.196	0.196	0.196	0	0	Ökobaudat. Prozess-Datensatz: Mauerziegel (ungefüllt) (de). (accessed 28 June 2023).
majority organic	cellulose insulation	0.301	0.301	0.301	0.95	0.44	Ökobaudat. Process Data set: Lose Zellulosedämmung (en). (accessed 28 June 2023).
minority organic	clay construction board	0.0055	0.0055	0.0055	0.011	0.5	Schroeder; H.; Lemke; M. 2020. Ökologische Bilanzierungen für Lehmbaustoffe. Dachverband Lehm e.V.; Weimar; Deutschland. (accessed 29 June 2023).
majority organic	clt	0.2639	0.2639	0.2639	0.8828	0.5	Ökobaudat. Process Data set: Cross laminated timber (German average) (en). (accessed 28 June 2023).
non-organic	concrete C25-30	0.082	0.082	0.082	0	0	Ökobaudat. Prozess-Datensatz: Beton der Druckfestigkeitsklasse C 25/30 (de). (accessed 28 June 2023).
majority organic	counter battens	0.1381	0.1381	0.1381	0.88	0.44	Ökobaudat. Prozess-Datensatz: Konstruktionsvollholz (Durchschnitt DE) (de). (accessed 28 June 2023).
majority organic	cross diagonally glued board layers	0.2	0.2	0.2	0.88	0.61	Fa. Ing Erwin Thoma Holz GmbH. 2014. UMWELTDEKLARATION nach EN 15804. Holz100 Massivholzbauweise.
minority organic	dry screed	0.1554	0.1554	0.1554	0.064	0.064	Ökobaudat. Process Data set: Dry floor screed (gypsum cardboard) (thickness 0.025 m); 20 kg/m2 (en). (accessed 28 June 2023).
non-organic	elastic-bonded fill 90kg-m2	0.0147	0.0147	0.0147	0	0	Ökobaudat. Prozess-Datensatz: Splitt 2/15 (de). (accessed 28 June 2023).
non-organic	EPDM roof membrane rootproof	4.3	4.3	4.3	0	0	Ökobaudat. Prozess-Datensatz: Dachbahnen EPDM (Dicke 0;0015 m) (de). (accessed 28 June 2023).
majority organic	facade panel carbon made of air	0	0.66	1.32	1	0.72	Made of Air GmbH (accessed 1 July 2023).
non-organic	fermacell comb fill	0.0311	0.0417	0.0522	0	0	Fermacell GmbH. 2012. Sicherheitsdatenblatt gemäß 1907/2006/EG; Artikel 31 FERMACELL Wabenschüttung Zum Einbringen in die FERMACELL Estrich-Wabe. SDB 8.2.1_41. version 02. (accessed 28 June 2023).;
							Sustainable Solutions Corporation. 2016. IMA-NA Calcium Carbonate Life Cycle Assessment. (accessed 28 June 2023).
minority organic	fiber cement board Eternit	0.7514	0.7514	0.7514	0.05	0.5	Institut Bauen und Umwelt e.V. 2019. UMWELT-PRODUKTDEKLARATION nach ISO 14025 und EN 15804+A1. Faserzementtafeln NATURA; TEXTURA and MATERIA. Eternit GmbH. EPD-ELH-20180136-CAC1-DE. (accessed 28 June 2023).
minority organic	fill lime chippings	0.0147	0.0147	0.0147	0.12	0.12	Ökobaudat. Prozess-Datensatz: Splitt 2/15 (de). (accessed 28 June 2023).
non-organic	floating screed - calcium sulphate	0.107	0.1135	0.12	0	0	Ökobaudat. Prozess-Datensatz: Estrichmörtel-Calciumsulfatestrich (de). (accessed 28 June 2023).;
							Ökobaudat. Prozess-Datensatz: Calciumsulfatestrich (de). (accessed 28 June 2023).
non-organic	foam glass plate	1.45	1.45	1.45	0	0	Institut Bauen und Umwelt e.V. 2021. ENVIRONMENTAL PRODUCT DECLARATION as per ISO 14025 and EN 15804+A2. FOAMGLAS® T3+. Pittsburgh Corning Europe NV. EPD-PCE-20200300-IBB2-EN. (accessed 28 June 2023).
minority organic	gypsum fibreboard dry screed	0.0262	0.0262	0.0262	0.175	0.43	Institut Bauen und Umwelt e.V. 2022. UMWELT-PRODUKTDEKLARATION nach ISO 14025 und EN 15804+A2. fermacell® GipsfaserPlatten James Hardie Europe GmbH. EPD-JAM-20220071-CBD1-DE. (accessed 28 June 2023).
non-organic	gypsum fibreboard high	0.077	0.077	0.077	0	0	Ökobaudat. Process Data set: Gypsum Fibreboard (en). (accessed 28 June 2023).
non-organic	gypsum fibreboard low	0.3186	0.3186	0.3186	0	0	Ökobaudat. Prozess-Datensatz: Gipsfaserplatte (Dicke 0;01 m) (de). (accessed 28 June 2023).
non-organic	gypsum plaster	0.155	0.162	0.168	0	0	IBO Österreichisches Institut für Bauen und Ökologie GmbH. IBO-Richtwerte für Baumaterialien; Stand: Juni 2013. Putze; -träger; Mörtel; Estriche; Bauplatten. (accessed 28 June 2023).
majority organic	impact sound - wood fibre insulation board	0.371	0.371	0.371	0.85	0.5	Ökobaudat. Process Data set: Wood fibre insulation boards (en). (accessed 28 June 2023).
minority organic	impact sound insulation board isover EP1e	1.17	1.285	1.4	0.05	0.05	Institut Bauen und Umwelt e.V. 2021. UMWELT-PRODUKTDEKLARATION nach ISO 14025 und EN 15804+A1. MineralwolleDämmstoff im mittleren Rohdichtebereich. FMI Fachverband Mineralwolleindustrie e.V. EPDFMI20210019IBG1DE. (accessed 28 June 2023).;
							Institut Bauen und Umwelt e.V. 2021. MineralwolleDämmstoff im niedrigen Rohdichtebereich. FMI Fachverband Mineralwolleindustrie e.V. EPDFMI20210020IBG1DE. (accessed 28 June 2023).
non-organic	impact sound insulation mineral-eps board	1.14	1.14	1.14	0	0	Ökobaudat. Process Data set: Mineral wool insulation (high bulk density range) (en). (accessed 28 June 2023).
minority organic	substrate	0.165	0.165	0.165	0.1	0.58	Ökobaudat. Prozess-Datensatz: Vegetationssubtrat (de). (accessed 28 June 2023).;
							Government of Western Australia. Agriculture and Food. (accessed 28 June 2023).
majority organic	larch-boarding	0.2	0.2	0.2	0.88	0.61	Fa. Ing Erwin Thoma Holz GmbH. 2014. UMWELTDEKLARATION nach EN 15804. Holz100 Massivholzbauweise.
non-organic	lime plaster	0.155	0.162	0.168	0	0	IBO Österreichisches Institut für Bauen und Ökologie GmbH. IBO-Richtwerte für Baumaterialien; Stand: Juni 2013. Putze; -träger; Mörtel; Estriche; Bauplatten. (accessed 28 June 2023).
non-organic	limestone	0.108	0.136	0.15	0	0	Ökobaudat. Process Data set: Kalksandstein - Baustoffwerke Havelland GmbH & Co. KG - Planelemente PE 175; 1890 kg/m³ (en). (accessed 28 June 2023).;
							Ökobaudat. Process Data set: Kalksandstein (en). (accessed 28 June 2023).;
							Forum Nachhaltiges Bauen. Kalksandsteine Ökobilanz. (accessed 28 June 2023).
non-organic	metallsplint	1.676	1.676	1.676	0	0	Ökobaudat. Prozess-Datensatz: Metalldeckensysteme aus Aluminium (de). (accessed 28 June 2023).;
							Ökobaudat. Prozess-Datensatz: Metalldeckensysteme aus Stahl (de). (accessed 28 June 2023).
non-organic	min wool ins fleece laminated	0.92	1.1	1.28	0	0	Ökobaudat. Prozess-Datensatz: Einblasdämmung Mineralwolle (de). (accessed 28 June 2023).;
							Ökobaudat. Prozess-Datensatz: Mineralwolle (Fassaden-Dämmung) (de). (accessed 28 June 2023).;
							Ökobaudat. Prozess-Datensatz: Mineralwolle (Innenausbau-Dämmung) (de). (accessed 28 June 2023).
non-organic	mineral plaster	0.415	0.415	0.415	0	0	Ökobaudat. Prozess-Datensatz: WDVS Verklebung und Beschichtung Leichtputz mineralisch (de). (accessed 28 June 2023).
non-organic	mineral wool	1.174	1.174	1.174	0	0	Ökobaudat. Prozess-Datensatz: Mineralwolle-Dämmstoff im mittleren Rohdichtebereich (de). (accessed 28 June 2023).
majority organic	osb	0.245	0.245	0.245	0.925	0.5	Ökobaudat. Prozess-Datensatz: EGGER OSB-Platten (de). (accessed 28 June 2023).
majority organic	parquet	1.005	1.005	1.005	0.9	0.45	Ökobaudat. Process Data set: Mehrschichtparkett (Durchschnitt DE) (en). (accessed 28 June 2023).
non-organic	Petersen Tegl	0.303	0.303	0.303	0	0	EPD Danmark. 2022. VERIFIED ENVIRONMENTAL PRODUCT DECLARATION | ISO 14025 & EN 15804:2012 + A1:2013. MD-19006-EN_rev1. (accessed 28 June 2023).
non-organic	plaster	0.155	0.162	0.168	0	0	IBO Österreichisches Institut für Bauen und Ökologie GmbH. IBO-Richtwerte für Baumaterialien; Stand: Juni 2013. Putze; -träger; Mörtel; Estriche; Bauplatten. (accessed 28 June 2023).
	reinforced concrete	0.107	0.107	0.107	0	0	combined: 0.98 https://oekobaudat.de/OEKOBAU.DAT/datasetdetail/process.xhtml?uuid=a758fb6a-7fb1-4cdc-b652-c42cf2f7632c&version=20.20.020&stock=OBD_2023_I&lang=de
non-organic							0.02: https://oekobaudat.de/OEKOBAU.DAT/datasetdetail/process.xhtml?uuid=8565038f-5c21-48d7-94cb-958498ba9dd3&version=20.23.050&stock=OBD_2023_I&lang=de
non-organic	retention boxes	0.82	1.23	1.64	0	0	Alsabri; A.; Tahir; F.; Al-Ghamdi; S.G. 2022. Environmental impacts of polypropylene (PP) production and prospects of its recycling in the GCC region. Materials Today: Proceedings. Volume 56. Part 4. 2022. Pages 2245-2251. ISSN 2214-7853. https://doi.org/10.1016/j.matpr.2021.11.574.;
							Optigrün.WASSER-RETENTIONSBOX WRB 85I. (accessed 28 June 2023).
non-organic	rockwool	1.26	1.26	1.26	0	0	Institut Bauen und Umwelt e.V. 2018. UMWELT-PRODUKTDEKLARATION nach ISO 14025 und EN 15804+A1. ROCKWOOL Steinwolle-Dämmstoffe im niedrigen Rohdichtebereich. DEUTSCHE ROCKWOOL GmbH & Co. KG. EPD-DRW-20180065-IBC1-DE. (accessed 28 June 2023).
non-organic	separation protection storage fleece	2.522	2.522	2.522	0	0	Ökobaudat. Prozess-Datensatz: PE/PP Vlies (de). (accessed 28 June 2023).
majority organic	solid wood core beech-dowels	0.2	0.2	0.2	0.88	0.61	Fa. Ing Erwin Thoma Holz GmbH. 2014. UMWELTDEKLARATION nach EN 15804. Holz100 Massivholzbauweise.
majority organic	solid wood floorboards	0.3681	0.3681	0.3681	0.91	0.46	Ökobaudat. Prozess-Datensatz: Massivholzparkett (Durchschnitt DE) (de). (accessed 28 June 2023).
non-organic	steico wall and lvl	0.635	0.635	0.635	0.8744	0.5	Ökobaudat. Process Data set: STEICO LVL (en). (accessed 28 June 2023).
majority organic	supporting lath	0.1381	0.1381	0.1381	0.88	0.44	Ökobaudat. Process Data set: KVH structural timber (German average) (en). (accessed 28 June 2023).
non-organic	thermoplan mz7 brick	0.24	0.24	0.24	0	0	ZIEGELWERK BELLENBERG Wiest GmbH & Co. KG. 2023. Thermoplan MZ70. Das Optimum für Modernes Bauen. MZ70 · 04-2023. (accessed 28 June 2023).;
							Ökobaudat. Prozess-Datensatz: Mauerziegel (mit Dämmstoff gefüllt) (de). (accessed 28 June 2023).
majority organic	thoma wood100	0.2	0.2	0.2	0.88	0.61	Fa. Ing Erwin Thoma Holz GmbH. 2014. UMWELTDEKLARATION nach EN 15804. Holz100 Massivholzbauweise.
non-organic	tiles	0.6938	0.6938	0.6938	0	0	Ökobaudat. Prozess-Datensatz: Keramische Fliesen und Platten (de). (accessed 28 June 2023).
majority organic	wood fibre insulation board	1.197	1.197	1.197	0.85	0.5	Ökobaudat. Prozess-Datensatz: STEICO Holzfaserdämmplatten aus dem Nassverfahren (de). (accessed 29 June 2023).
majority organic	wood fibre insulation board bestwood schneider180	0.596	0.596	0.596	0.95	0.5	Institut Bauen und Umwelt e.V. 2016. UMWELT-PRODUKTDEKLARATION nach ISO 14025 und EN 15804. Holzfaserdämmplatten. Holzwerk Gebr. Schneider GmbH. EPD-HWS-20160105-IAC2-DE. (accessed 29 June 2023).
majority organic	wood fibre insulation board steico dry	1	1	1	0.86	0.5	Ökobaudat. Process Data set: STEICO Holzfaserdämmplatten aus dem Trockenverfahren (en). (accessed 29 June 2023).
majority organic	wood fibre insulation board steico flex	0.989	0.989	0.989	0.8497	0.5	Ökobaudat. Prozess-Datensatz: STEICOflex (de). (accessed 29 June 2023).
majority organic	wood fibre insulation board steico therm sd	1	1	1	0.86	0.5	Institut Bauen und Umwelt e.V. 2016. UMWELT-PRODUKTDEKLARATION nach ISO 14025 und EN 15804. STEICO Holzfaserdämmplatten aus dem Nassverfahren. STEICO SE. EPD-STE-20200174-IBA1-DE. (accessed 29 June 2023).
majority organic	wood fibre insulation board steico wet	1.121	1.121	1.121	0.913	0.5	Institut Bauen und Umwelt e.V. 2016. UMWELT-PRODUKTDEKLARATION nach ISO 14025 und EN 15804. STEICO Holzfaserdämmplatten aus dem Nassverfahren. STEICO SE. EPD-STE-20200174-IBA1-DE. (accessed 29 June 2023).
majority organic	wood fibre insulation mats	0.37	0.37	0.37	0.85	0.5	Ökobaudat. Process Data set: STEICO Holzfaserdämmplatten aus dem Trockenverfahren (en). (accessed 28 June 2023).
majority organic	wood fibre insulation steico flex 036	1.136	1.136	1.136	0.9	0.5	Institut Bauen und Umwelt e.V. 2020. UMWELT-PRODUKTDEKLARATION nach ISO 14025 und EN 15804+A1. STEICOflex flexible Holzfaser-Gefachdämmung. STEICO SE. EPD-STE-20200175-IBA1-DE. (accessed 29 June 2023).
majority organic	wood fibre insulation steico zell	1.087	1.087	1.087	0.81	0.5	Institut Bauen und Umwelt e.V. 2020. UMWELT-PRODUKTDEKLARATION nach /ISO 14025/ und /EN 15804/. HolzfaserEinblasdämmung STEICOzell. STEICO SE. EPDSTE20200172IBA1DE. (accessed 29 June 2023).
majority organic	wood soft fibreboard lithowood	1.197	1.197	1.197	0.91	0.5	Ökobaudat. Prozess-Datensatz: STEICO Holzfaserdämmplatten aus dem Nassverfahren (de). (accessed 29 June 2023).;
							GUTEX. GUTEX Multitherm. (accessed 29 June 2023).;
							GUTEX. GUTEX Pyroresist Wall. (accessed 29 June 2023).
majority organic	wood steico-joist+lvl	1.01	1.01	1.01	0.9	0.5	Institut Bauen und Umwelt e.V. 2019. UMWELT-PRODUKTDEKLARATION nach ISO 14025 und EN 15804+A1. STEICOwall und STEICOjoist Stegträger. STEICO SE. EPD-STE-20190106-IBC1-DE. (accessed 29 June 2023).
majority organic	wooden beams	0.03	0.03	0.03	0.88	0.44	Ökobaudat. Prozess-Datensatz: Balkenschichtholz (Durchschnitt DE) (de). (accessed 28 June 2023).
majority organic	wooden frame-steicowall 4 5-20	1.01	1.01	1.01	0.9	0.5	Institut Bauen und Umwelt e.V. 2019. UMWELT-PRODUKTDEKLARATION nach /ISO 14025/ und /EN 15804/. STEICOwall und STEICOjoist Stegträger. STEICO SE. EPD-STE-20190106-IBC1-DE. (accessed 29 June 2023).
majority organic	wooden substructure	0.1468	0.1468	0.1468	0.88	0.445	Ökobaudat. Prozess-Datensatz: Konstruktionsvollholz (Durchschnitt DE) (de). (accessed 29 June 2023).;
							Institut Bauen und Umwelt e.V. 2019. UMWELT-PRODUKTDEKLARATION nach /ISO 14025/ und /EN 15804/. binderholz Brettsperrholz BBS - binderholz X-LAM BBS - binderholz Cross Laminated Timber CLT BBS. Binderholz Bausysteme GmbH. EPD-BBS-20190021-IBB1-DE. (accessed 29 June 2023).
non-organic	XPS hard foam board 035	4.24	4.24	4.24	0	0	Baubook GmbH. (accessed 1 July 2023).

## Sheet: Table S2
building assembly	building parts (wall/ ceiling/ roof)	material	weight [t]	contribution of material to building part [%]	contribution of material to whole building [%]	contribution of building part to weight of whole building [%]
Brick	wall	thermoplan mz7 brick	121.733	42.44	4.84
Brick	wall	Petersen Tegl	67.3966	23.5	2.68
Brick	wall	bauder eco s mineral wool	49.9471	17.41	1.98
Brick	wall	lime plaster	40.6895	14.19	1.62
Brick	wall	counter battens	3.65139	1.27	0.15
Brick	wall	supporting lath	3.38998	1.18	0.13
Brick		total wall	286.807	100	/	11.4
Brick	ceiling	brick unfilled	550.606	33.91	21.88
Brick	ceiling	concrete c20-25	472.931	29.12	18.79
Brick	ceiling	floating screed - calcium sulphate	447.46	27.55	17.78
Brick	ceiling	lime plaster	72.6516	4.47	2.89
Brick	ceiling	impact sound insulation mineral-eps board	40.1562	2.47	1.6
Brick	ceiling	parquet	40.1495	2.47	1.6
Brick		total ceiling	1623.95	100	/	64.53
Brick	roof	intensive substrate light	190.484	31.44	7.57
Brick	roof	brick unfilled	183.535	30.29	7.29
Brick	roof	concrete c20-25	157.643	26.02	6.26
Brick	roof	rockwool hardrock 038 roof insulation board	39.2634	6.48	1.56
Brick	roof	plaster	24.2171	4	0.96
Brick	roof	retention boxes	7.25975	1.2	0.29
Brick	roof	EPDM roof membrane rootproof	2.54769	0.42	0.1
Brick	roof	absorbent capillary fleece	0.76505	0.13	0.03
Brick	roof	separation-protection storage fleece	0.11476	0.02	< 0.01
Brick		total roof	605.83	100	/	24.07
Brick		total Brick	2516.59	/	100	100
Reinforced Concrete	wall	limestone	582.43	84.93	14.27
Reinforced Concrete	wall	gypsum fibreboard dry screed	65.0967	9.49	1.59
Reinforced Concrete	wall	min wool ins fleece laminated	20.5563	3	0.5
Reinforced Concrete	wall	made of air	17.1265	2.5	0.42
Reinforced Concrete	wall	wooden constructon	0.56846	0.08	0.01
Reinforced Concrete		total wall	685.778	100	/	16.8
Reinforced Concrete	ceiling	reinforced concrete	1912.16	76.1	46.84
Reinforced Concrete	ceiling	floating screed - calcium sulphate	447.46	17.81	10.96
Reinforced Concrete	ceiling	plaster	72.6516	2.89	1.78
Reinforced Concrete	ceiling	parquet	40.1495	1.6	0.98
Reinforced Concrete	ceiling	impact sound insulation mineral-eps board 40	40.1562	1.6	0.98
Reinforced Concrete		total ceiling	2512.58	100	/	61.55
Reinforced Concrete	roof	reinforced concrete	637.385	72.14	15.61
Reinforced Concrete	roof	intensive substrate light	190.484	21.56	4.67
Reinforced Concrete	roof	foamglas plate	28.0453	3.17	0.69
Reinforced Concrete	roof	lime plaster	16.9492	1.92	0.42
Reinforced Concrete	roof	retention boxes	7.25975	0.82	0.18
Reinforced Concrete	roof	EPDM roofing membrane	2.54769	0.29	0.06
Reinforced Concrete	roof	separation protection storage fleece	0.76505	0.09	0.02
Reinforced Concrete	roof	absorbent capillary fleece	0.11476	0.01	< 0.01
Reinforced Concrete		total roof	883.551	100	/	21.65
Reinforced Concrete		total Reinforced Concrete	4081.91	/	100	100
Light Weight Timber	wall	clay construction board (Lehmbauplatte)	54.6519	34.22	5.69
Light Weight Timber	wall	Steico Wall + LVL	31.4001	19.66	3.27
Light Weight Timber	wall	fiber cement board Eternit (Faserzementplatte Eternit)	24.6621	15.44	2.57
Light Weight Timber	wall	wood fibre insulation steicoflex 036 (Holzfaserdämmung steicoflex 036)	19.4693	12.19	2.03
Light Weight Timber	wall	OSB	17.4705	10.94	1.82
Light Weight Timber	wall	wood fibre insulation board (Holzfaserdämmplatte)	8.6689	5.43	0.9
Light Weight Timber	wall	supporting lath (Traglattung)	3.39	2.12	0.35
Light Weight Timber		total wall	159.713	100	/	16.61
Light Weight Timber	ceiling	Wolf Phonestar (2x15)	149.156	31.17	15.52
Light Weight Timber	ceiling	gypsum fibreboard (GF-Platte) (Gipsfaser)	137.682	28.77	14.32
Light Weight Timber	ceiling	parquet	64.14	13.4	6.67
Light Weight Timber	ceiling	OSB	57.2156	11.96	5.95
Light Weight Timber	ceiling	Steico-Joist+LVL edge beams	36.9561	7.72	3.84
Light Weight Timber	ceiling	wood fibre insulation-Steicoflex	21.0431	4.4	2.19
Light Weight Timber	ceiling	wood fibre insulation Steicotherm Therm sd	12.2396	2.56	1.27
Light Weight Timber	ceiling	metal splint (Federschiene)	0.1202	0.03	0.01
Light Weight Timber		total ceiling	478.552	100	/	49.78
Light Weight Timber	roof	intensive substrate light (Intensivsubstrat -leicht)	190.484	58.97	19.82
Light Weight Timber	roof	wood fibre insulation board Steico dry (Holzfaserdämmplatte STEICO roof dry)	53.5409	16.58	5.57
Light Weight Timber	roof	gypsum fibreboard (Gipsfaserplatte)	22.9425	7.1	2.39
Light Weight Timber	roof	OSB	15.4257	4.78	1.6
Light Weight Timber	roof	wood fibre insulation board (Holzfaserdämmplatte) Steico universal	12.0468	3.73	1.25
Light Weight Timber	roof	Steico-Joist+LVL edge beams	10.7468	3.33	1.12
Light Weight Timber	roof	retention boxes (Retentionsboxen)	7.2598	2.25	0.76
Light Weight Timber	roof	wood fibre insulation steico zell(Holzfasereinblasdämmung) SteicoZell	7.0979	2.2	0.74
Light Weight Timber	roof	EPDM roof membrane rootproof (EPDM Dachbahn)	2.5477	0.79	0.27
Light Weight Timber	roof	absorbent capillary fleece (Saugkapilarvlies)	0.765	0.24	0.08
Light Weight Timber	roof	separation-protection storage	0.1148	0.04	0.01
		fleece (Trenn-Schutz und Speichervlies)
Light Weight Timber	roof	metal splint (Federschiene)	0.0334	0.01	< 0.01
Light Weight Timber		total roof	323.006	100	/	33.6
Light Weight Timber		total Light Weight Timber	961.271	/	100	100
Timber Frame	wall	wooden frame (Holzrahmen) 6/24	42.4557	30.83	3.85
Timber Frame	wall	wood fibre insulation board (Holzfaserdämmplatte) Steico protect Typ M	23.6404	17.17	2.14
Timber Frame	wall	larch boarding (Lärchenschalung)	18.3482	13.32	1.66
Timber Frame	wall	cellulose insulation (Zellulosedämmung)	17.8411	12.96	1.62
Timber Frame	wall	OSB	17.4705	12.69	1.58
Timber Frame	wall	gypsum fibreboard (Gipsfaserplatte)	14.5625	10.57	1.32
Timber Frame	wall	supporting lath (Traglattung)	3.39	2.46	0.31
Timber Frame		total wall	137.708	100	/	12.48
Timber Frame	ceiling	dry screed (Lithowood Trockenestrich LW86 Granit)	260.076	39.41	23.56
Timber Frame	ceiling	gypsum fibreboard (Gipsfaserplatte)	114.74	17.39	10.4
Timber Frame	ceiling	wooden beam (Holzbalken 220x80)	72.4274	10.97	6.56
Timber Frame	ceiling	dry filling (Trockenschüttung LW10 Cemwood)	61.1873	9.27	5.54
Timber Frame	ceiling	OSB	57.2156	8.67	5.18
Timber Frame	ceiling	parquet (Parkett)	40.1495	6.08	3.64
Timber Frame	ceiling	Wood fiber insulation board (Holzfaserdämmmatte)	22.6745	3.44	2.05
Timber Frame	ceiling	wood soft fiberboard (Lithowood Holzweichfaserplatte)	19.1244	2.9	1.73
Timber Frame	ceiling	insulation board (Lithowood Trittschallplatte)	12.2396	1.85	1.11
Timber Frame	ceiling	metallsplint (Federschiene)	0.1202	0.02	0.01
Timber Frame		total ceiling	659.954	100	/	59.79
Timber Frame	roof	intensive substrate light (Intensivsubstrat -leicht)	190.484	62.23	17.26
Timber Frame	roof	HFD Platte druckfest -STEICO roof dry	35.6884	11.66	3.23
Timber Frame	roof	wooden beams 20-80 (Holzbalken 20/80)	21.984	7.18	1.99
Timber Frame	roof	gypsum fibreboard (Gipsfaserplatte)	21.673	7.08	1.96
Timber Frame	roof	OSB	19.0718	6.23	1.73
Timber Frame	roof	retention boxes (Retentionsboxen)	7.2598	2.37	0.66
Timber Frame	roof	rockwool [Steinwolle]	6.4785	2.12	0.59
Timber Frame	roof	EPDM roof membrane rootproof (EPDM Dachbahn)	2.5477	0.83	0.23
Timber Frame	roof	absorbent capillary fleece (Saugkapilarvlies)	0.765	0.25	0.07
Timber Frame	roof	separation-protection storage	0.1148	0.04	0.01
		fleece (Trenn-Schutz und Speichervlies)
Timber Frame	roof	metal splint (Federschiene)	0.0359	0.01	< 0.01
Timber Frame		total roof	306.103	100	/	27.73
Timber Frame		total Timber Frame	1103.77	/	100	100
Glue Laminated Timber	wall	Glue Laminated Timber	119.907	58.7	7.77
Glue Laminated Timber	wall	Wood fiber insulation board Steico protect type M	23.6404	11.57	1.53
Glue Laminated Timber	wall	Wooden frame/Steicowall 4,5/20	23.1891	11.35	1.5
Glue Laminated Timber	wall	Mineral plaster	22.7822	11.15	1.48
Glue Laminated Timber	wall	Cellulose insulation	14.7541	7.22	0.96
Glue Laminated Timber		total wall	204.272	100		13.23
Glue Laminated Timber	ceiling	Elastic-bonded fill	407.278	41.16	26.39
Glue Laminated Timber	ceiling	Glue Laminated Timber	344.161	34.78	22.3
Glue Laminated Timber	ceiling	Dry screed	127.856	12.92	8.28
Glue Laminated Timber	ceiling	Tiles	91.8058	9.28	5.95
Glue Laminated Timber	ceiling	Impact Sound woodfiber insulation board	18.347	1.85	1.19
Glue Laminated Timber		total ceiling	989.447	100	/	64.1
Glue Laminated Timber	roof	Intensive substrate light	190.484	54.45	12.34
Glue Laminated Timber	roof	Cross laminated timber element	127.477	36.44	8.26
Glue Laminated Timber	roof	Gypsum fibreboard	13.0008	3.72	0.84
Glue Laminated Timber	roof	Retention boxes	7.25974	2.08	0.47
Glue Laminated Timber	roof	XPS hard foam board	8.15853	2.33	0.53
Glue Laminated Timber	roof	EPDM roof membrane (rootproof)	2.54769	0.73	0.17
Glue Laminated Timber	roof	Absorbent capillary fleece	0.76505	0.22	0.05
Glue Laminated Timber	roof	Separation-protection storage fleece	0.11476	0.03	0.01
Glue Laminated Timber		total roof	349.808	100	/	22.66
Glue Laminated Timber		total Glue Laminated Timber	1543.53	/	100	100
Dowel Laminated Timber	wall	Wood Fiber insulation board bestwood Schneider180	134.301	36.52	7.43
Dowel Laminated Timber	wall	Cross/-diagonally glued board layers	71.7664	19.51	3.97
Dowel Laminated Timber	wall	Cross/-diagonally glued board layers	71.7664	19.51	3.97
Dowel Laminated Timber	wall	Larch-boarding	19.379	5.27	1.07
Dowel Laminated Timber	wall	Supporting lath	3.38998	0.92	0.19
Dowel Laminated Timber	wall	thoma wood 100	67.1524	18.26	3.71
Dowel Laminated Timber		total wall	367.755	100	/	20.34
Dowel Laminated Timber	ceiling	thoma wood100	440.372	41.67	24.35
Dowel Laminated Timber	ceiling	Fermacell comb fill	349.921	33.11	19.35
Dowel Laminated Timber	ceiling	Best screed element	91.797	8.69	5.08
Dowel Laminated Timber	ceiling	Best screed element	91.797	8.69	5.08
Dowel Laminated Timber	ceiling	Solid wood floorboards	40.1495	3.8	2.22
Dowel Laminated Timber	ceiling	Woodfibre insulation board	24.4757	2.32	1.35
Dowel Laminated Timber	ceiling	Impact Sound insulation board isover EP1	18.3576	1.74	1.02
Dowel Laminated Timber		total ceiling	1056.87	100	/	58.45
Dowel Laminated Timber	roof	Intensive substrate light	190.484	49.65	10.53
Dowel Laminated Timber	roof	thoma wood100	146.79	38.26	8.12
Dowel Laminated Timber	roof	Woodfibre insulation board Steico dry	35.6936	9.3	1.97
Dowel Laminated Timber	roof	Retention boxes	7.25975	1.89	0.4
Dowel Laminated Timber	roof	EPDM roof membrane (rootproof)	2.54769	0.66	0.14
Dowel Laminated Timber	roof	Absorbent capillary fleece	0.76505	0.2	0.04
Dowel Laminated Timber	roof	Separation-protection storage fleece	0.11476	0.03	0.01
Dowel Laminated Timber		total roof	383.655	100	/	21.22
Dowel Laminated Timber		total Dowel Laminated Timber	1808.28	/	100	100

## Sheet: Table S3 Output Table
building assembly	material	part	weight [t]	C emissions during production [t]	C storage [t]	material group
Brick	intensive substrate light	roof	190.484	8.5779	11.0481	intensive substrate light
Brick	EPDM roof membrane rootproof	roof	2.54769	2.98988	0	EPDM roof membrane rootproof
Brick	concrete C25-30	roof	157.643	3.52798	0	concrete
Brick	brick unfilled	roof	183.535	9.81775	0	brick
Brick	absorbent capillary fleece	roof	0.765047	1.16927	0	fleece layer
Brick	parquet	ceiling	40.1495	11.0125	16.2606	timber furnishing
Brick	lime plaster	ceiling	72.6516	3.21216	0	plaster
Brick	impact sound insulation mineral-eps board	ceiling	40.1562	12.4938	0	mineral board
Brick	floating screed - calcium sulphate	ceiling	447.46	13.8608	0	floating screed
Brick	concrete C25-30	ceiling	472.931	10.584	0	concrete
Brick	brick unfilled	ceiling	550.606	29.4533	0	brick
Brick	plaster	roof	24.2171	1.07072	0	plaster
Brick	retention boxes	roof	7.25975	2.43705	0	retention boxes
Brick	separation protection storage fleece	roof	0.114757	0.0789881	0	fleece layer
Brick	rockwool	roof	39.2634	13.5019	0	rockwool
Brick	thermoplan mz7 brick	wall	121.733	7.97363	0	brick
Brick	supporting lath	wall	3.38998	0.12777	1.3126	timber structure
Brick	Petersen Tegl	wall	67.3966	5.57338	0	brick
Brick	mineral wool	wall	49.9471	16.0035	0	mineral wool
Brick	lime plaster	wall	40.6895	1.79901	0	plaster
Brick	counter battens	wall	3.65139	0.137623	1.41382	timber structure
Reinforced Concrete	absorbent capillary fleece	roof	0.765047	1.16927	0	fleece layer
Reinforced Concrete	reinforced concrete	ceiling	1912.16	55.84	0	reinforced concrete
Reinforced Concrete	plaster	ceiling	72.6516	3.21216	0	plaster
Reinforced Concrete	parquet	ceiling	40.1495	11.0125	16.2606	timber furnishing
Reinforced Concrete	impact sound insulation mineral-eps board	ceiling	40.1562	12.4938	0	mineral board
Reinforced Concrete	floating screed - calcium sulphate	ceiling	447.46	13.8608	0	floating screed
Reinforced Concrete	EPDM roof membrane rootproof	roof	2.54769	2.98988	0	EPDM roof membrane rootproof
Reinforced Concrete	intensive substrate light	roof	190.484	8.5779	11.0481	intensive substrate light
Reinforced Concrete	foam glas plate	roof	28.0453	11.0985	0	foam glas plate
Reinforced Concrete	reinforced concrete	roof	637.385	18.6133	0	reinforced concrete
Reinforced Concrete	lime plaster	roof	16.9492	0.749379	0	plaster
Reinforced Concrete	retention boxes	roof	7.25975	2.43705	0	retention boxes
Reinforced Concrete	separation protection storage fleece	roof	0.114757	0.0789881	0	fleece layer
Reinforced Concrete	gypsum plaster	wall	65.0967	2.87814	0	plaster
Reinforced Concrete	limestone	wall	582.43	21.6182	0	limestone
Reinforced Concrete	facade panel carbon made of air	wall	17.1265	3.08496	12.3311	facade panel carbon made of air
Reinforced Concrete	wooden substructure	wall	0.56846	0.0227753	0.222609	timber structure
Reinforced Concrete	min wool ins fleece laminated	wall	20.5563	6.1713	0	fleece layer
Light Weight Timber	wood steico-joist+lvl	ceiling	36.9561	10.187	16.6302	timber structure
Light Weight Timber	clay construction board	wall	54.6519	0.0823345	0.300585	mineral based boards
Light Weight Timber	fiber cement board Eternit	wall	24.6621	5.05754	0.616553	mineral based boards
Light Weight Timber	osb	wall	17.4704	1.16817	8.08008	timber structure
Light Weight Timber	steico wall and lvl	wall	31.4001	5.4418	13.7281	timber structure
Light Weight Timber	supporting lath	wall	3.38998	0.12777	1.3126	timber structure
Light Weight Timber	wood fibre insulation board	wall	8.66892	2.83202	3.68429	timber insulation
Light Weight Timber	wood fibre insulation steico flex 036	wall	19.4693	6.03623	8.76117	timber insulation
Light Weight Timber	wood steico-joist+lvl	roof	10.7468	2.96237	4.83608	timber structure
Light Weight Timber	wood fibre insulation steico zell	roof	7.09788	2.1057	2.87464	timber insulation
Light Weight Timber	wood fibre insulation board steico wet	roof	12.0468	3.68567	5.49938	timber insulation
Light Weight Timber	wood fibre insulation board steico dry	roof	53.5409	14.6124	23.0226	timber insulation
Light Weight Timber	separation protection storage fleece	roof	0.114757	0.0789881	0	fleece layer
Light Weight Timber	retention boxes	roof	7.25975	2.43705	0	retention boxes
Light Weight Timber	osb	roof	15.4257	1.03145	7.1344	timber structure
Light Weight Timber	intensive substrate light	roof	190.484	8.5779	11.0481	intensive substrate light
Light Weight Timber	gypsum fibreboard high	roof	22.9425	0.482136	0	gypsum fibreboard
Light Weight Timber	EPDM roof membrane rootproof	roof	2.54769	2.98988	0	EPDM roof membrane rootproof
Light Weight Timber	absorbent capillary fleece	roof	0.765047	1.16927	0	fleece layer
Light Weight Timber	wood fibre insulation board steico flex	ceiling	21.0431	5.67822	8.94017	timber insulation
Light Weight Timber	parquet	ceiling	64.14	17.5927	25.9767	timber furnishing
Light Weight Timber	osb	ceiling	57.2156	3.82576	26.4622	timber structure
Light Weight Timber	gypsum fibreboard high	ceiling	137.682	2.89338	0	gypsum fibreboard
Light Weight Timber	dry screed	ceiling	149.156	6.32599	0.610942	dry screed
Light Weight Timber	wood fibre insulation board steico therm sd	ceiling	12.2396	3.34045	5.26303	timber insulation
Timber Frame	separation protection storage fleece	roof	0.114757	0.0789881	0	fleece layer
Timber Frame	rockwool	roof	6.47853	2.22784	0	rockwool
Timber Frame	retention boxes	roof	7.25975	2.43705	0	retention boxes
Timber Frame	osb	roof	19.0718	1.27525	8.82071	timber structure
Timber Frame	metallsplint	roof	0.0358	0.0163755	0	metallsplint
Timber Frame	intensive substrate light	roof	190.484	8.5779	11.0481	intensive substrate light
Timber Frame	gypsum fibreboard low	roof	21.673	1.88453	0	gypsum fibreboard
Timber Frame	EPDM roof membrane rootproof	roof	2.54769	2.98988	0	EPDM roof membrane rootproof
Timber Frame	absorbent capillary fleece	roof	0.765047	1.16927	0	fleece layer
Timber Frame	wooden beams	ceiling	72.4274	0.593009	28.0439	timber structure
Timber Frame	wood soft fibreboard lithowood	ceiling	19.1244	6.24768	8.70159	timber insulation
Timber Frame	wood fibre insulation mats	ceiling	22.6745	2.2897	9.63668	timber insulation
Timber Frame	parquet	ceiling	40.1495	11.0125	16.2606	timber furnishing
Timber Frame	osb	ceiling	57.2156	3.82576	26.4622	timber structure
Timber Frame	wood fibre insulation board	roof	35.6884	11.6589	15.1676	timber insulation
Timber Frame	metallsplint	ceiling	0.120163	0.0549645	0	metallsplint
Timber Frame	gypsum fibreboard high	ceiling	114.74	2.41125	0	gypsum fibreboard
Timber Frame	fill lime chippings	ceiling	61.1873	0.245313	0.881098	fill lime chippings
Timber Frame	dry screed	ceiling	260.076	11.0304	1.06527	dry screed
Timber Frame	impact sound - wood fibre insulation board	ceiling	12.2396	1.23931	5.20183	timber insulation
Timber Frame	wooden beams	roof	21.984	0.179997	8.51221	timber structure
Timber Frame	cellulose insulation	wall	17.841	1.46563	7.45756	cellulose insulation
Timber Frame	gypsum fibreboard low	wall	14.5625	1.26625	0	gypsum fibreboard
Timber Frame	wood fibre insulation board steico wet	wall	23.6404	7.23266	10.7918	timber insulation
Timber Frame	wooden substructure	wall	42.4557	1.70098	16.6257	timber structure
Timber Frame	larch-boarding	wall	18.3482	1.00153	9.84934	timber furnishing
Timber Frame	osb	wall	17.4704	1.16817	8.08008	timber structure
Timber Frame	supporting lath	wall	3.38998	0.12777	1.3126	timber structure
Glue Laminated Timber	clt	ceiling	344.161	24.7869	151.913	timber structure
Glue Laminated Timber	elastic-bonded fill 90kg-m2	ceiling	407.278	1.63286	0	elastic-bonded fill 90kg-m2
Glue Laminated Timber	tiles	ceiling	91.8058	17.3837	0	tiles
Glue Laminated Timber	impact sound - wood fibre insulation board	ceiling	18.347	1.8577	7.79747	timber insulation
Glue Laminated Timber	absorbent capillary fleece	roof	0.765047	1.16927	0	fleece layer
Glue Laminated Timber	clt	roof	127.477	9.18105	56.2683	timber structure
Glue Laminated Timber	gypsum fibreboard dry screed	ceiling	127.856	0.913539	9.62113	gypsum fibreboard
Glue Laminated Timber	EPDM roof membrane rootproof	roof	2.54769	2.98988	0	EPDM roof membrane rootproof
Glue Laminated Timber	gypsum fibreboard low	roof	13.0008	1.13045	0	gypsum fibreboard
Glue Laminated Timber	mineral plaster	wall	22.7822	2.58037	0	mineral plaster
Glue Laminated Timber	retention boxes	roof	7.25975	2.43705	0	retention boxes
Glue Laminated Timber	intensive substrate light	roof	190.484	8.5779	11.0481	intensive substrate light
Glue Laminated Timber	wooden frame-steicowall 4 5-20	wall	23.1891	6.3921	10.4351	timber structure
Glue Laminated Timber	wood fibre insulation board steico wet	wall	23.6404	7.23265	10.7918	timber insulation
Glue Laminated Timber	clt	wall	119.907	8.63582	52.9267	timber structure
Glue Laminated Timber	cellulose insulation	wall	14.7541	1.21204	6.16723	cellulose insulation
Glue Laminated Timber	XPS hard foam board 035	roof	8.15853	9.44094	0	XPS hard foam board 035
Glue Laminated Timber	separation protection storage fleece	roof	0.114757	0.0789881	0	fleece layer
Dowel Laminated Timber	thoma wood100	roof	146.79	8.01244	78.797	timber structure
Dowel Laminated Timber	wood fibre insulation board steico dry	roof	35.6936	9.74154	15.3482	timber insulation
Dowel Laminated Timber	cross diagonally glued board layers	wall	143.533	7.83464	77.0484	timber structure
Dowel Laminated Timber	larch-boarding	wall	19.379	1.05779	10.4026	timber furnishing
Dowel Laminated Timber	solid wood core beech-dowels	wall	67.1524	3.66547	36.0474	timber structure
Dowel Laminated Timber	supporting lath	wall	3.38998	0.12777	1.3126	timber structure
Dowel Laminated Timber	wood fibre insulation board bestwood schneider180	wall	134.301	21.8455	63.7928	timber insulation
Dowel Laminated Timber	separation protection storage fleece	roof	0.114757	0.0789881	0	fleece layer
Dowel Laminated Timber	retention boxes	roof	7.25975	2.43705	0	retention boxes
Dowel Laminated Timber	EPDM roof membrane rootproof	roof	2.54769	2.98988	0	EPDM roof membrane rootproof
Dowel Laminated Timber	best screed element	ceiling	183.594	1.31179	13.8154	best screed
Dowel Laminated Timber	fermacell comb fill	ceiling	349.921	3.98239	0	fermacell comb fill
Dowel Laminated Timber	impact sound insulation board isover EP1e	ceiling	18.3576	6.43809	0.0458941	mineral board
Dowel Laminated Timber	solid wood floorboards	ceiling	40.1495	4.03352	16.8066	timber furnishing
Dowel Laminated Timber	thoma wood100	ceiling	440.372	24.0374	236.392	timber structure
Dowel Laminated Timber	wood fibre insulation board	ceiling	24.4756	7.99588	10.4022	timber insulation
Dowel Laminated Timber	absorbent capillary fleece	roof	0.765047	1.16927	0	fleece layer
Dowel Laminated Timber	intensive substrate light	roof	190.484	8.5779	11.0481	intensive substrate light
